# Supplementary material for: Design and rationale of a large, international, prospective cohort study to evaluate the occurrence of malformations and perinatal/neonatal death using insulin detemir in pregnant women with diabetes in comparison with other long-acting insulins
Source: PubMed Central journal article supplement (PMC5241954; doi:10.1186/s12884-016-1177-4), 2017-01-18

# Pregnancy Registry Study

Study ID: NN304-4016

Dear Madam,

This questionnaire contains questions about the health of your child at one month of age. We kindly ask you to complete the questionnaire before your scheduled contact with your physician so that you are prepared for the questions your physician will ask you. Your answers will help us monitor and assess the health status of your child.

Thank you for taking the time to complete this questionnaire. Your answers are highly appreciated!

## QUESTIONNAIRE 1 month after you gave birth

Study doctor name: \_\_\_\_\_

Study coordinator name: \_\_\_\_\_

Clinic telephone no.: ☎ \_\_\_\_\_

Patient no.: \_\_\_\_\_

Infant no (in case of more than one child): \_\_\_\_\_

**Please record the following, so that you are ready for the contact:**

- Height and weight of your child
- Duration of breast feeding
- Any medical problems with your child during the first month

**Date of contact (1-month follow-up):**

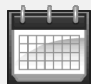

Date: \_\_\_\_\_

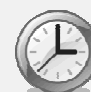

Time: \_\_\_\_\_

# Pregnancy Registry Study

Study ID: NN304-4016

| Body measurements of your child:                       |                                                                                                                                                                                                                                                             |   |   |   |   |   |   |   |  |  |  |   |   |   |   |   |   |   |   |   |  |                                                                                                                                                                                                                                                                                                                                                                                                                                                                                             |  |  |  |  |  |  |  |  |  |  |  |  |  |  |  |  |  |  |  |  |  |  |  |  |  |  |  |  |  |  |  |  |  |  |  |  |  |  |  |  |
|--------------------------------------------------------|-------------------------------------------------------------------------------------------------------------------------------------------------------------------------------------------------------------------------------------------------------------|---|---|---|---|---|---|---|--|--|--|---|---|---|---|---|---|---|---|---|--|---------------------------------------------------------------------------------------------------------------------------------------------------------------------------------------------------------------------------------------------------------------------------------------------------------------------------------------------------------------------------------------------------------------------------------------------------------------------------------------------|--|--|--|--|--|--|--|--|--|--|--|--|--|--|--|--|--|--|--|--|--|--|--|--|--|--|--|--|--|--|--|--|--|--|--|--|--|--|--|--|
| Your child's length at approximately one month of age: | <table border="1"> <tr> <td> </td><td> </td><td> </td><td> </td><td> </td><td> </td><td> </td><td> </td><td> </td><td> </td> </tr> <tr> <td>d</td><td>d</td><td>m</td><td>m</td><td>m</td><td>y</td><td>y</td><td>y</td><td>y</td><td> </td> </tr> </table> |   |   |   |   |   |   |   |  |  |  | d | d | m | m | m | y | y | y | y |  | <table border="1"> <tr> <td> </td><td> </td><td> </td><td> </td><td> </td><td> </td><td> </td><td> </td><td> </td><td> </td> </tr> <tr> <td> </td><td> </td><td> </td><td> </td><td> </td><td> </td><td> </td><td> </td><td> </td><td> </td> </tr> <tr> <td> </td><td> </td><td> </td><td> </td><td> </td><td> </td><td> </td><td> </td><td> </td><td> </td> </tr> <tr> <td> </td><td> </td><td> </td><td> </td><td> </td><td> </td><td> </td><td> </td><td> </td><td> </td> </tr> </table> |  |  |  |  |  |  |  |  |  |  |  |  |  |  |  |  |  |  |  |  |  |  |  |  |  |  |  |  |  |  |  |  |  |  |  |  |  |  |  |  |
|                                                        |                                                                                                                                                                                                                                                             |   |   |   |   |   |   |   |  |  |  |   |   |   |   |   |   |   |   |   |  |                                                                                                                                                                                                                                                                                                                                                                                                                                                                                             |  |  |  |  |  |  |  |  |  |  |  |  |  |  |  |  |  |  |  |  |  |  |  |  |  |  |  |  |  |  |  |  |  |  |  |  |  |  |  |  |
| d                                                      | d                                                                                                                                                                                                                                                           | m | m | m | y | y | y | y |  |  |  |   |   |   |   |   |   |   |   |   |  |                                                                                                                                                                                                                                                                                                                                                                                                                                                                                             |  |  |  |  |  |  |  |  |  |  |  |  |  |  |  |  |  |  |  |  |  |  |  |  |  |  |  |  |  |  |  |  |  |  |  |  |  |  |  |  |
|                                                        |                                                                                                                                                                                                                                                             |   |   |   |   |   |   |   |  |  |  |   |   |   |   |   |   |   |   |   |  |                                                                                                                                                                                                                                                                                                                                                                                                                                                                                             |  |  |  |  |  |  |  |  |  |  |  |  |  |  |  |  |  |  |  |  |  |  |  |  |  |  |  |  |  |  |  |  |  |  |  |  |  |  |  |  |
|                                                        |                                                                                                                                                                                                                                                             |   |   |   |   |   |   |   |  |  |  |   |   |   |   |   |   |   |   |   |  |                                                                                                                                                                                                                                                                                                                                                                                                                                                                                             |  |  |  |  |  |  |  |  |  |  |  |  |  |  |  |  |  |  |  |  |  |  |  |  |  |  |  |  |  |  |  |  |  |  |  |  |  |  |  |  |
|                                                        |                                                                                                                                                                                                                                                             |   |   |   |   |   |   |   |  |  |  |   |   |   |   |   |   |   |   |   |  |                                                                                                                                                                                                                                                                                                                                                                                                                                                                                             |  |  |  |  |  |  |  |  |  |  |  |  |  |  |  |  |  |  |  |  |  |  |  |  |  |  |  |  |  |  |  |  |  |  |  |  |  |  |  |  |
|                                                        |                                                                                                                                                                                                                                                             |   |   |   |   |   |   |   |  |  |  |   |   |   |   |   |   |   |   |   |  |                                                                                                                                                                                                                                                                                                                                                                                                                                                                                             |  |  |  |  |  |  |  |  |  |  |  |  |  |  |  |  |  |  |  |  |  |  |  |  |  |  |  |  |  |  |  |  |  |  |  |  |  |  |  |  |
| Your child's weight at approximately one month of age: | <table border="1"> <tr> <td> </td><td> </td><td> </td><td> </td><td> </td><td> </td><td> </td><td> </td><td> </td><td> </td> </tr> <tr> <td>d</td><td>d</td><td>m</td><td>m</td><td>m</td><td>y</td><td>y</td><td>y</td><td>y</td><td> </td> </tr> </table> |   |   |   |   |   |   |   |  |  |  | d | d | m | m | m | y | y | y | y |  | <table border="1"> <tr> <td> </td><td> </td><td> </td><td> </td><td> </td><td> </td><td> </td><td> </td><td> </td><td> </td> </tr> <tr> <td> </td><td> </td><td> </td><td> </td><td> </td><td> </td><td> </td><td> </td><td> </td><td> </td> </tr> <tr> <td> </td><td> </td><td> </td><td> </td><td> </td><td> </td><td> </td><td> </td><td> </td><td> </td> </tr> <tr> <td> </td><td> </td><td> </td><td> </td><td> </td><td> </td><td> </td><td> </td><td> </td><td> </td> </tr> </table> |  |  |  |  |  |  |  |  |  |  |  |  |  |  |  |  |  |  |  |  |  |  |  |  |  |  |  |  |  |  |  |  |  |  |  |  |  |  |  |  |
|                                                        |                                                                                                                                                                                                                                                             |   |   |   |   |   |   |   |  |  |  |   |   |   |   |   |   |   |   |   |  |                                                                                                                                                                                                                                                                                                                                                                                                                                                                                             |  |  |  |  |  |  |  |  |  |  |  |  |  |  |  |  |  |  |  |  |  |  |  |  |  |  |  |  |  |  |  |  |  |  |  |  |  |  |  |  |
| d                                                      | d                                                                                                                                                                                                                                                           | m | m | m | y | y | y | y |  |  |  |   |   |   |   |   |   |   |   |   |  |                                                                                                                                                                                                                                                                                                                                                                                                                                                                                             |  |  |  |  |  |  |  |  |  |  |  |  |  |  |  |  |  |  |  |  |  |  |  |  |  |  |  |  |  |  |  |  |  |  |  |  |  |  |  |  |
|                                                        |                                                                                                                                                                                                                                                             |   |   |   |   |   |   |   |  |  |  |   |   |   |   |   |   |   |   |   |  |                                                                                                                                                                                                                                                                                                                                                                                                                                                                                             |  |  |  |  |  |  |  |  |  |  |  |  |  |  |  |  |  |  |  |  |  |  |  |  |  |  |  |  |  |  |  |  |  |  |  |  |  |  |  |  |
|                                                        |                                                                                                                                                                                                                                                             |   |   |   |   |   |   |   |  |  |  |   |   |   |   |   |   |   |   |   |  |                                                                                                                                                                                                                                                                                                                                                                                                                                                                                             |  |  |  |  |  |  |  |  |  |  |  |  |  |  |  |  |  |  |  |  |  |  |  |  |  |  |  |  |  |  |  |  |  |  |  |  |  |  |  |  |
|                                                        |                                                                                                                                                                                                                                                             |   |   |   |   |   |   |   |  |  |  |   |   |   |   |   |   |   |   |   |  |                                                                                                                                                                                                                                                                                                                                                                                                                                                                                             |  |  |  |  |  |  |  |  |  |  |  |  |  |  |  |  |  |  |  |  |  |  |  |  |  |  |  |  |  |  |  |  |  |  |  |  |  |  |  |  |
|                                                        |                                                                                                                                                                                                                                                             |   |   |   |   |   |   |   |  |  |  |   |   |   |   |   |   |   |   |   |  |                                                                                                                                                                                                                                                                                                                                                                                                                                                                                             |  |  |  |  |  |  |  |  |  |  |  |  |  |  |  |  |  |  |  |  |  |  |  |  |  |  |  |  |  |  |  |  |  |  |  |  |  |  |  |  |

| Duration of your breast feeding period:                                                                                                         | Start date                                                                                                                                                                                                                                                  | Stop date, if applicable |   |   |   |   |   |   |  |  |  |   |   |   |   |   |   |   |   |   |  |                                                                                                                                                                                                                                                             |  |  |  |  |  |  |  |  |  |  |   |   |   |   |   |   |   |   |   |  |
|-------------------------------------------------------------------------------------------------------------------------------------------------|-------------------------------------------------------------------------------------------------------------------------------------------------------------------------------------------------------------------------------------------------------------|--------------------------|---|---|---|---|---|---|--|--|--|---|---|---|---|---|---|---|---|---|--|-------------------------------------------------------------------------------------------------------------------------------------------------------------------------------------------------------------------------------------------------------------|--|--|--|--|--|--|--|--|--|--|---|---|---|---|---|---|---|---|---|--|
| Duration of <b>exclusive</b> breast feeding (your child is only fed breast milk)                                                                | <table border="1"> <tr> <td> </td><td> </td><td> </td><td> </td><td> </td><td> </td><td> </td><td> </td><td> </td><td> </td> </tr> <tr> <td>d</td><td>d</td><td>m</td><td>m</td><td>m</td><td>y</td><td>y</td><td>y</td><td>y</td><td> </td> </tr> </table> |                          |   |   |   |   |   |   |  |  |  | d | d | m | m | m | y | y | y | y |  | <table border="1"> <tr> <td> </td><td> </td><td> </td><td> </td><td> </td><td> </td><td> </td><td> </td><td> </td><td> </td> </tr> <tr> <td>d</td><td>d</td><td>m</td><td>m</td><td>m</td><td>y</td><td>y</td><td>y</td><td>y</td><td> </td> </tr> </table> |  |  |  |  |  |  |  |  |  |  | d | d | m | m | m | y | y | y | y |  |
|                                                                                                                                                 |                                                                                                                                                                                                                                                             |                          |   |   |   |   |   |   |  |  |  |   |   |   |   |   |   |   |   |   |  |                                                                                                                                                                                                                                                             |  |  |  |  |  |  |  |  |  |  |   |   |   |   |   |   |   |   |   |  |
| d                                                                                                                                               | d                                                                                                                                                                                                                                                           | m                        | m | m | y | y | y | y |  |  |  |   |   |   |   |   |   |   |   |   |  |                                                                                                                                                                                                                                                             |  |  |  |  |  |  |  |  |  |  |   |   |   |   |   |   |   |   |   |  |
|                                                                                                                                                 |                                                                                                                                                                                                                                                             |                          |   |   |   |   |   |   |  |  |  |   |   |   |   |   |   |   |   |   |  |                                                                                                                                                                                                                                                             |  |  |  |  |  |  |  |  |  |  |   |   |   |   |   |   |   |   |   |  |
| d                                                                                                                                               | d                                                                                                                                                                                                                                                           | m                        | m | m | y | y | y | y |  |  |  |   |   |   |   |   |   |   |   |   |  |                                                                                                                                                                                                                                                             |  |  |  |  |  |  |  |  |  |  |   |   |   |   |   |   |   |   |   |  |
| Duration of <b>partial</b> breast feeding (your child is still fed breast milk, but also receive other nourishment (formula and/or solid food): | <table border="1"> <tr> <td> </td><td> </td><td> </td><td> </td><td> </td><td> </td><td> </td><td> </td><td> </td><td> </td> </tr> <tr> <td>d</td><td>d</td><td>m</td><td>m</td><td>m</td><td>y</td><td>y</td><td>y</td><td>y</td><td> </td> </tr> </table> |                          |   |   |   |   |   |   |  |  |  | d | d | m | m | m | y | y | y | y |  | <table border="1"> <tr> <td> </td><td> </td><td> </td><td> </td><td> </td><td> </td><td> </td><td> </td><td> </td><td> </td> </tr> <tr> <td>d</td><td>d</td><td>m</td><td>m</td><td>m</td><td>y</td><td>y</td><td>y</td><td>y</td><td> </td> </tr> </table> |  |  |  |  |  |  |  |  |  |  | d | d | m | m | m | y | y | y | y |  |
|                                                                                                                                                 |                                                                                                                                                                                                                                                             |                          |   |   |   |   |   |   |  |  |  |   |   |   |   |   |   |   |   |   |  |                                                                                                                                                                                                                                                             |  |  |  |  |  |  |  |  |  |  |   |   |   |   |   |   |   |   |   |  |
| d                                                                                                                                               | d                                                                                                                                                                                                                                                           | m                        | m | m | y | y | y | y |  |  |  |   |   |   |   |   |   |   |   |   |  |                                                                                                                                                                                                                                                             |  |  |  |  |  |  |  |  |  |  |   |   |   |   |   |   |   |   |   |  |
|                                                                                                                                                 |                                                                                                                                                                                                                                                             |                          |   |   |   |   |   |   |  |  |  |   |   |   |   |   |   |   |   |   |  |                                                                                                                                                                                                                                                             |  |  |  |  |  |  |  |  |  |  |   |   |   |   |   |   |   |   |   |  |
| d                                                                                                                                               | d                                                                                                                                                                                                                                                           | m                        | m | m | y | y | y | y |  |  |  |   |   |   |   |   |   |   |   |   |  |                                                                                                                                                                                                                                                             |  |  |  |  |  |  |  |  |  |  |   |   |   |   |   |   |   |   |   |  |

# Pregnancy Registry Study

Trial ID: NN304-4016

## Medical problems for your child

### Please record the following:

- Any medical problems your child has had since birth (examples: inflammation of the eye, sore throat, flu)
- Any medication your child has been given in connection with any of these medical problems
- Your own medication for this period in case you were breast feeding at the time of the event.

### Examples:

| Medical problems with your child |                    |                    | Medication for your child |                    |                    | Your own medication<br>(only if you are breast feeding at the time of the event) |                    |                    |
|----------------------------------|--------------------|--------------------|---------------------------|--------------------|--------------------|----------------------------------------------------------------------------------|--------------------|--------------------|
| Medical problem                  | Start date         | Stop date          | Name of medication        | Start date         | Stop date          | Name of medication                                                               | Start date         | Stop date          |
| <i>Inflammation of eye</i>       | <i>18-Jun-2013</i> | <i>21-Jun-2013</i> | <i>Chloramphenicol</i>    | <i>18-Jun-2013</i> | <i>25-Jun-2013</i> | <i>Paracetamol</i>                                                               | <i>19-Jun-2013</i> | <i>19-Jun-2013</i> |
| <i>Sore throat</i>               | <i>20-Jul-2013</i> | <i>25-Jul-2013</i> | <i>Penicillin</i>         | <i>20-Jul-2013</i> | <i>30-Jul-2013</i> | <i>N/A</i>                                                                       | <i>N/A</i>         | <i>N/A</i>         |
| <i>Flu</i>                       | <i>22-Aug-2013</i> | <i>27-Aug-2013</i> | <i>N/A</i>                | <i>N/A</i>         | <i>N/A</i>         | <i>Simvastatin</i>                                                               | <i>30-Jul-2012</i> | <i>ongoing</i>     |

# Pregnancy Registry Study

Trial ID: NN304-4016

| Medical problems with your child |            |           | Medication for your child |            |           | Your own medication<br>(only if you are breast feeding at the time of the event) |            |           |
|----------------------------------|------------|-----------|---------------------------|------------|-----------|----------------------------------------------------------------------------------|------------|-----------|
| Medical problem                  | Start date | Stop date | Name of medication        | Start date | Stop date | Name of medication                                                               | Start date | Stop date |
|                                  |            |           |                           |            |           |                                                                                  |            |           |
|                                  |            |           |                           |            |           |                                                                                  |            |           |
|                                  |            |           |                           |            |           |                                                                                  |            |           |
|                                  |            |           |                           |            |           |                                                                                  |            |           |
|                                  |            |           |                           |            |           |                                                                                  |            |           |
|                                  |            |           |                           |            |           |                                                                                  |            |           |
|                                  |            |           |                           |            |           |                                                                                  |            |           |
|                                  |            |           |                           |            |           |                                                                                  |            |           |

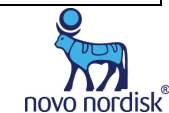

# Pregnancy Registry Study

Trial ID: NN304-4016

| Medical problems with your child |            |           | Medication for your child |            |           | Your own medication<br>(only if you are breast feeding at the time of the event) |            |           |
|----------------------------------|------------|-----------|---------------------------|------------|-----------|----------------------------------------------------------------------------------|------------|-----------|
| Medical problem                  | Start date | Stop date | Name of medication        | Start date | Stop date | Name of medication                                                               | Start date | Stop date |
|                                  |            |           |                           |            |           |                                                                                  |            |           |
|                                  |            |           |                           |            |           |                                                                                  |            |           |
|                                  |            |           |                           |            |           |                                                                                  |            |           |
|                                  |            |           |                           |            |           |                                                                                  |            |           |
|                                  |            |           |                           |            |           |                                                                                  |            |           |
|                                  |            |           |                           |            |           |                                                                                  |            |           |
|                                  |            |           |                           |            |           |                                                                                  |            |           |
|                                  |            |           |                           |            |           |                                                                                  |            |           |

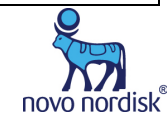

Supplement: 12884_2016_1177_MOESM1_ESM.pdf [file 12884_2016_1177_MOESM1_ESM.pdf]
